# Supplementary material for: Endothelial NOS (NOS3) impairs myocardial function in developing sepsis
Source: PubMed Central journal article supplement (PMC3597270; doi:10.1007/s00395-013-0330-8), 2013-02-10
Supplement: 395_2013_330_MOESM1_ESM.pdf [file 395_2013_330_MOESM1_ESM.pdf]

## **Online Resource 1**

### **Article title:**

Endothelial NOS (NOS 3) impairs myocardial function in developing sepsis

### **Journal name:**

Basic Research in Cardiology

### **Author names:**

Annette M. van de Sandt, MD; Rainer Windler, MSc; Axel Gödecke, PhD, Jan Ohlig, MD; Simone Zander MSc, Michael Reinartz, MSc, Jürgen Graf, MD; Ernst E. van Faassen, PhD; Tienush Rassaf, MD; Jürgen Schrader, MD; Malte Kelm, MD; Marc W. Merx, MD

### **Corresponding author:**

Marc W. Merx, M.D.

Department of Medicine

Division of Cardiology, Pneumology and Angiology

Moorenstrasse 5, D- 40225 Düsseldorf

Phone: +49 (0) 211- 8118801, Fax: +49 (0) 211- 8118812

Email: [marc.merx@med.uni-duesseldorf.de](mailto:marc.merx@med.uni-duesseldorf.de)

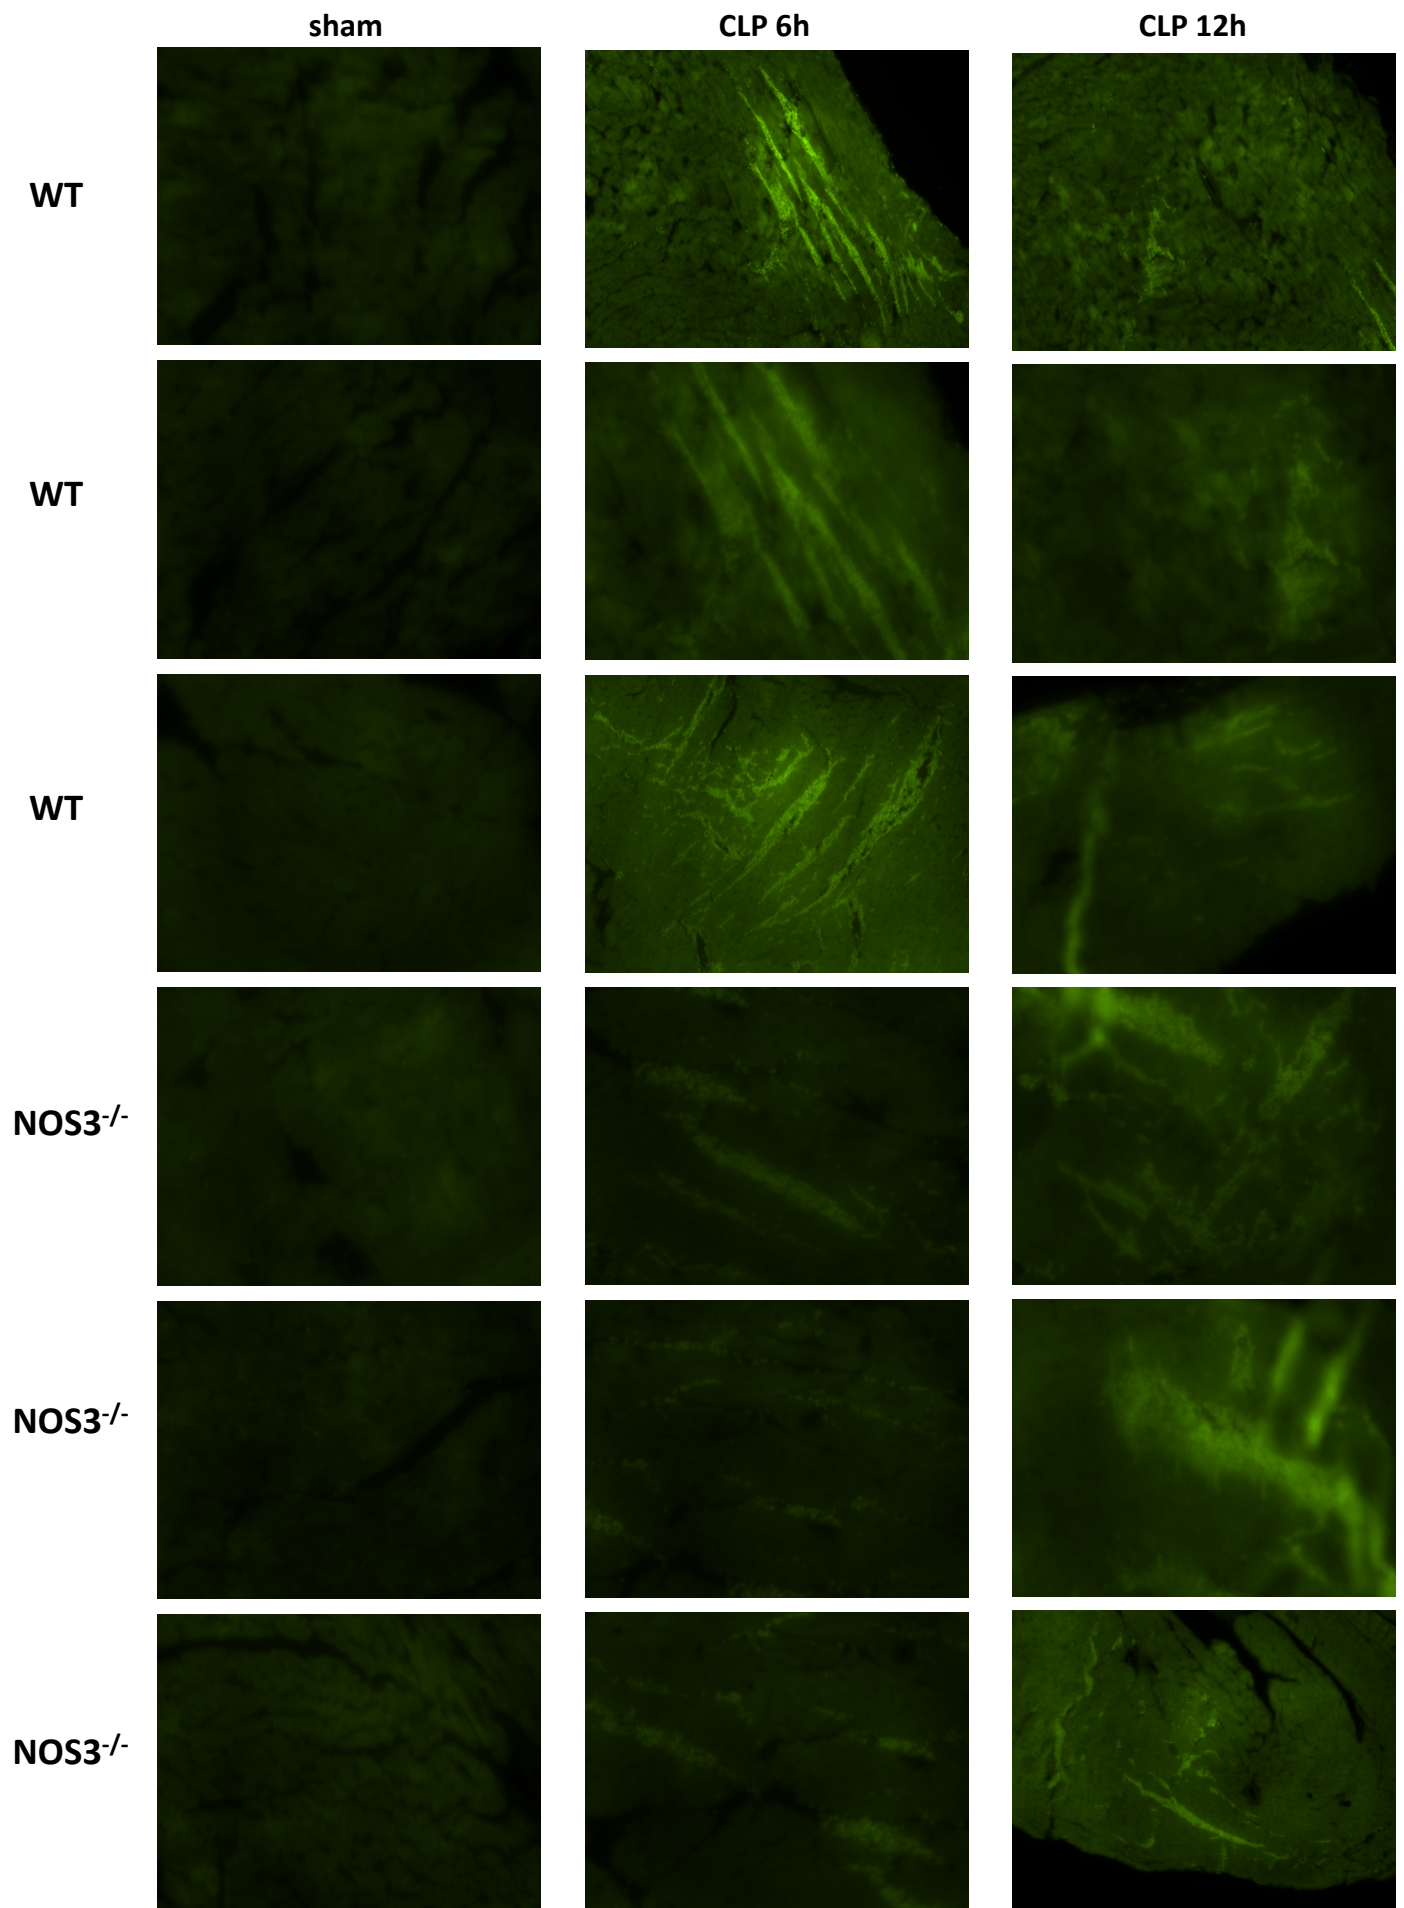

*Online Resource 1*

**Figure legend.**

**Online Resource 1. NOS3 increases 3-nitrotyrosine content in heart tissue in developing sepsis.** Immunohistochemical staining demonstrated an increase of nitrotyrosine in heart tissue of septic wildtype mice at 6 hours post CLP, whereas no differences could be detected in NOS3<sup>-/-</sup> mice.

---

**Methods Online Resource 1.**

**(Methods description included in main manuscript, reproduced here for convenience)**

**Immunohistochemistry.** Heart samples were fixed in 4% formaldehyde phosphate buffer, dehydrated and paraffin-embedded. For 3-nitrotyrosin detection serial sections (3 per mouse, 400µm apart) were incubated with a polyclonal antibody raised against nitrotyrosine (USBiological, N2700-06), followed by sheep anti-rabbit IgG conjugated to FITC (Rockland, 611-641-122).
