# Supplementary material for: Endothelial NOS (NOS3) impairs myocardial function in developing sepsis
Source: PubMed Central journal article supplement (PMC3597270; doi:10.1007/s00395-013-0330-8), 2013-02-10
Supplement: 395_2013_330_MOESM2_ESM.pdf [file 395_2013_330_MOESM2_ESM.pdf]

## **Online Resource 2**

### **Article title:**

Endothelial NOS (NOS 3) impairs myocardial function in developing sepsis

### **Journal name:**

Basic Research in Cardiology

### **Author names:**

Annette M. van de Sandt, MD; Rainer Windler, MSc; Axel Gödecke, PhD, Jan Ohlig, MD; Simone Zander MSc, Michael Reinartz, MSc, Jürgen Graf, MD; Ernst E. van Faassen, PhD; Tienush Rassaf, MD; Jürgen Schrader, MD; Malte Kelm, MD; Marc W. Merx, MD

### **Corresponding author:**

Marc W. Merx, M.D.

Department of Medicine

Division of Cardiology, Pneumology and Angiology

Moorenstrasse 5, D- 40225 Düsseldorf

Phone: +49 (0) 211- 8118801, Fax: +49 (0) 211- 8118812

Email: [marc.merx@med.uni-duesseldorf.de](mailto:marc.merx@med.uni-duesseldorf.de)

WT  
 NOS3<sup>-/-</sup>

### NOS2 expression

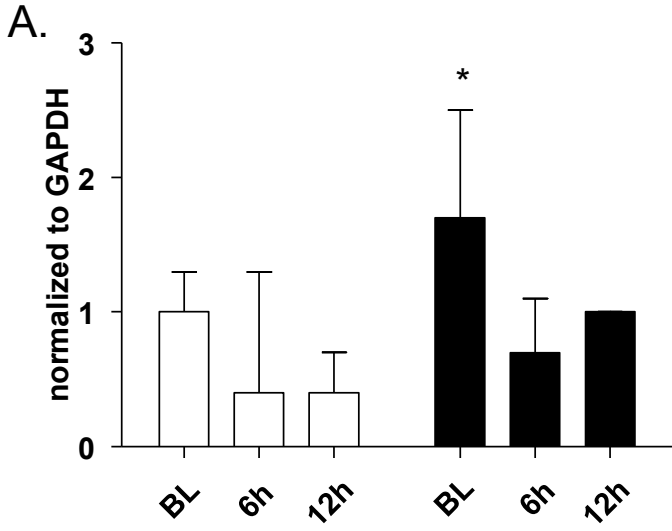

### NOS3 expression

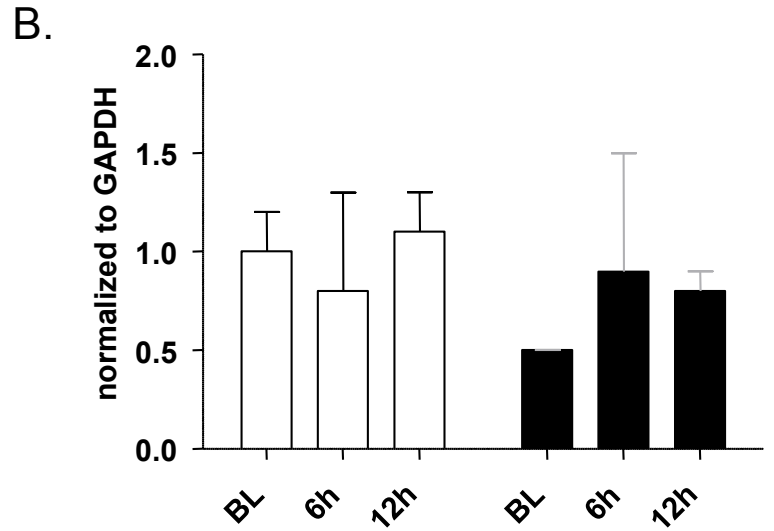

**C. anti-NOS2**

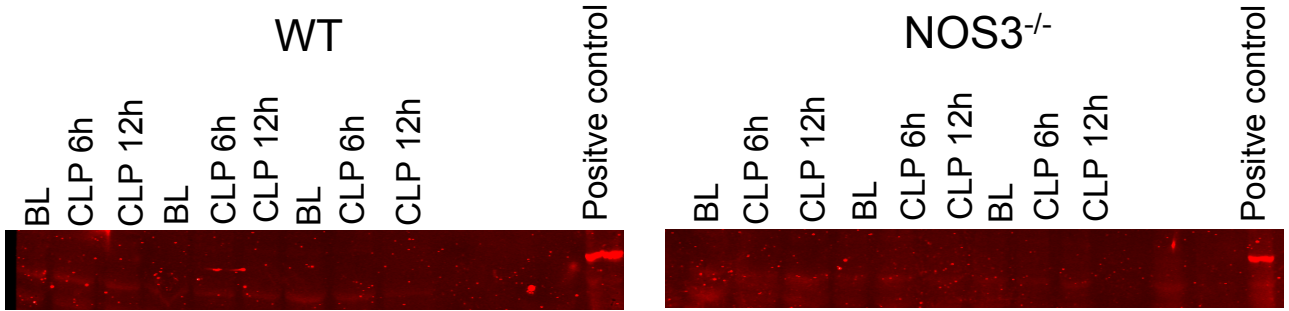

**D. anti-NOS3**

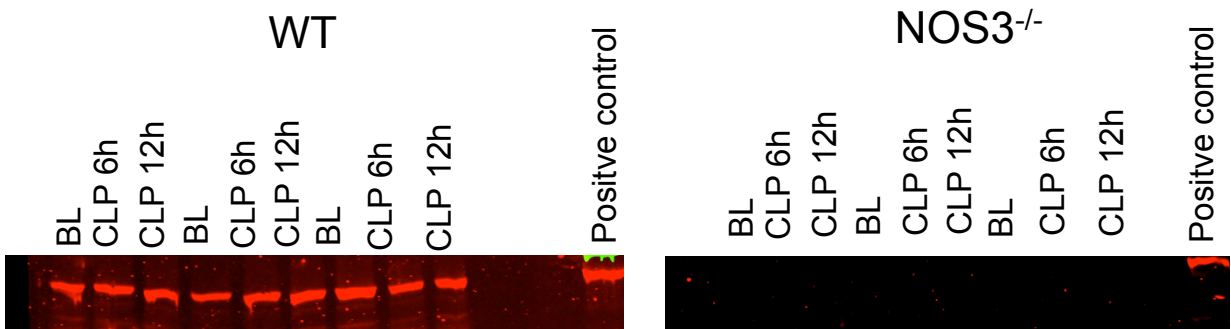

E.

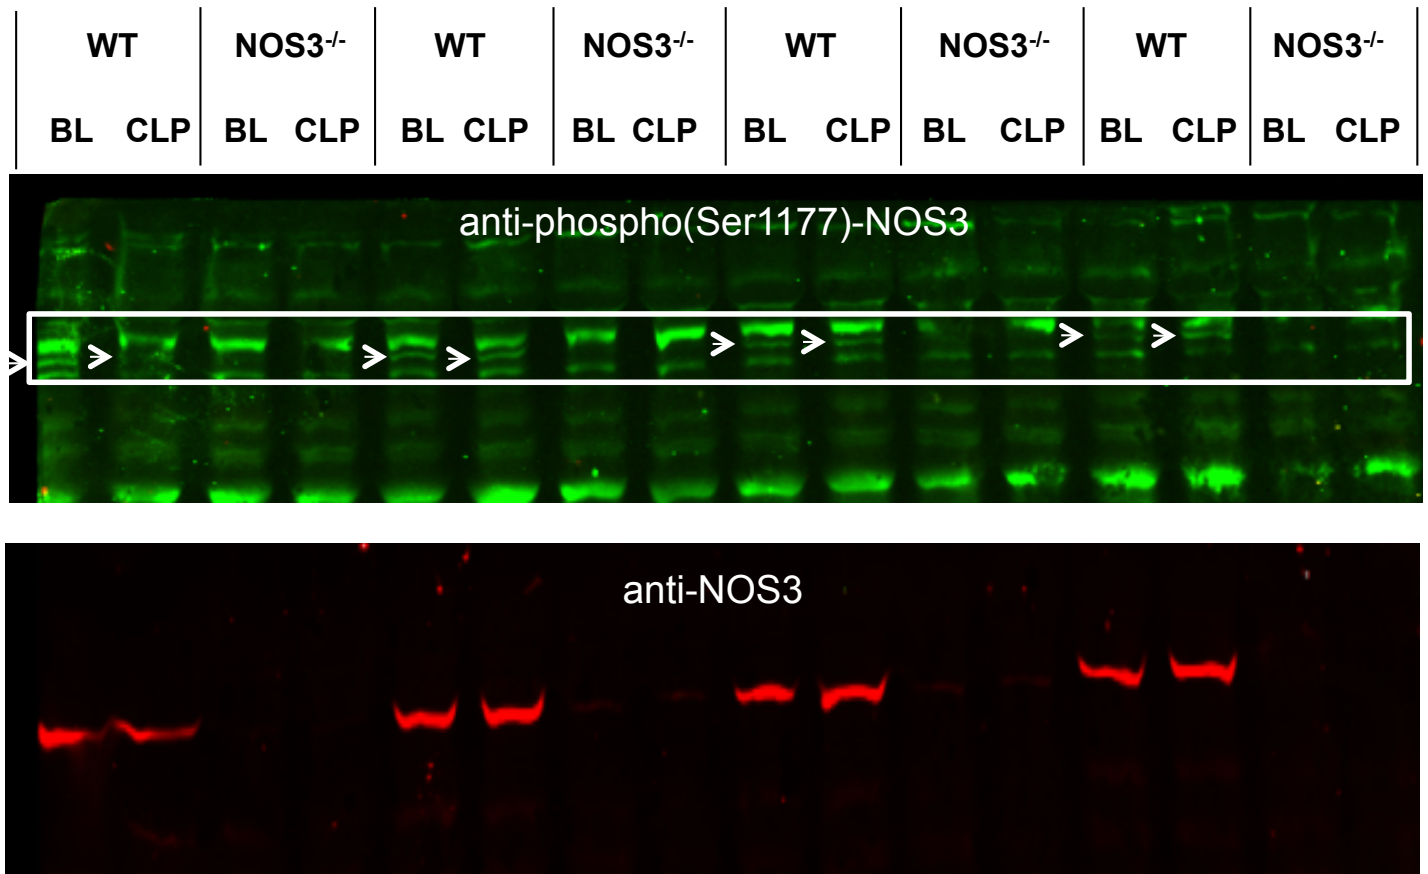

*Online Resource 2.*

### **Figure legend.**

**Online Resource 2.** 6 and 12 hours after sepsis induction revealed neither increase in NOS2- nor NOS3-expression in septic WT and NOS3<sup>-/-</sup> mice compared to baseline (A+B). Cardiac protein expression of NOS2 remained below detection levels in both strains (C). NOS3 protein expression did not differ in septic WT mice at 6 and 12 hours post CLP compared to baseline. Absence of NOS3 (eNOS) protein in NOS3<sup>-/-</sup> mice (D). No significant increase in phospho-NOS3 in septic WT mice compared to baseline (E).

---

### **Methods Online Resource 2.**

**RNA extraction and Quantitative RT-PCR analysis.** Total RNA was extracted from mouse hearts by using “RNeasy® fibrous tissue kit” (Qiagen). Total RNA (1µg per sample) was reverse-transcribed, and real-time PCR was performed in triplicate using the Applied Biosystems 7300 Fast Real-time PCR system and TaqMan® GenExpression Assays (Applied Biosystems) for NOS3 (nitric oxide synthase 3, endothelial; Mm00435217\_m1), NOS2 (nitric oxide synthase 2, inducible; Mm00440502\_m1), NOS1 (nitric oxide synthase 1, neuronal; Mm00435175\_m1), and GAPDH as endogenous control (glyceraldehyde-3-phosphate dehydrogenase; Mm99999915\_g1). The setup of reaction consisted of 1 µl of cDNA (10ng), 1 µl of TaqMan primer set, 10 µl Taq [TaqMan® Gen Expression Master Mix (2x); no. 4369016], and 8 µl of H<sub>2</sub>O. PCR was performed according to manufacture’s instructions (standard run type).

**Measurements of phosho-NOS3, NOS3, NOS2, and NOS1 protein.** Protein extracts were prepared by homogenization of mouse tissues in 50 mmol/L Tris (pH 7.5), 1 mmol/L EDTA, and 1 mmol/L PMSF. Extracts were centrifuged for 10 minutes at 10000 rpm. Supernatant protein was separated on 7,5% SDS polyacrylamide gels and electroblotted to nitrocellulose. Western Blot analyses were performed as previously described (1). Primary antibodies: phosho-eNOS/ NOS3 (Ser 1177) (Cell Signaling 9571S), eNOS/NOS3 (Transduction 610296), iNOS/NOS2 (Transduction N32020), nNOS/NOS1 (Transduction N31020). Secondary antibodies: IRDye goat anti-mouse or goat anti-rabbit (Licor). Antibodies were used according to manufacturer’s instructions and signals were detected with the LI-COR Odyssey Infrared Imaging System and the Odyssey Software V3.0.

### **Reference:**

1. Gödecke A; Circ Res. 1998;82:196
