# Supplementary material for: Endothelial NOS (NOS3) impairs myocardial function in developing sepsis
Source: PubMed Central journal article supplement (PMC3597270; doi:10.1007/s00395-013-0330-8), 2013-02-10
Supplement: 395_2013_330_MOESM3_ESM.pdf [file 395_2013_330_MOESM3_ESM.pdf]

### **Online Resource 3**

**Article title:**

Endothelial NOS (NOS 3) impairs myocardial function in developing sepsis

**Journal name:**

Basic Research in Cardiology

**Author names:**

Annette M. van de Sandt, MD; Rainer Windler, MSc; Axel Gödecke, PhD, Jan Ohlig, MD; Simone Zander MSc, Michael Reinartz, MSc, Jürgen Graf, MD; Ernst E. van Faassen, PhD; Tienush Rassaf, MD; Jürgen Schrader, MD; Malte Kelm, MD; Marc W. Merx, MD

**Corresponding author:**

Marc W. Merx. M.D.

Department of Medicine

Division of Cardiology, Pneumology and Angiology

Moorenstrasse 5, D- 40225 Düsseldorf

Phone: +49 (0) 211- 8118801, Fax: +49 (0) 211- 8118812

Email: [marc.merx@med.uni-duesseldorf.de](mailto:marc.merx@med.uni-duesseldorf.de)

**anti-Glutathione**

| WT |     | NOS3 <sup>-/-</sup> |     | WT |     | NOS3 <sup>-/-</sup> |     | WT |     | NOS3 <sup>-/-</sup> |     | WT |     | NOS3 <sup>-/-</sup> |     |
|----|-----|---------------------|-----|----|-----|---------------------|-----|----|-----|---------------------|-----|----|-----|---------------------|-----|
| BL | CLP | BL                  | CLP | BL | CLP | BL                  | CLP | BL | CLP | BL                  | CLP | BL | CLP | BL                  | CLP |

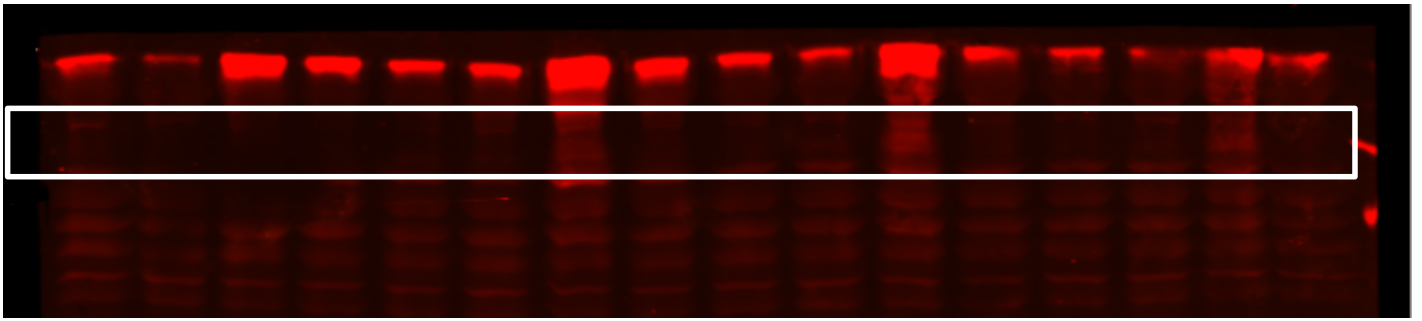

**anti-Glutathione**

| WT |     | NOS3 <sup>-/-</sup> |     | WT |     | NOS3 <sup>-/-</sup> |     | WT |     | NOS3 <sup>-/-</sup> |     | WT |     | NOS3 <sup>-/-</sup> |     |
|----|-----|---------------------|-----|----|-----|---------------------|-----|----|-----|---------------------|-----|----|-----|---------------------|-----|
| BL | CLP | BL                  | CLP | BL | CLP | BL                  | CLP | BL | CLP | BL                  | CLP | BL | CLP | BL                  | CLP |

**Membrane preincubation with DTT**

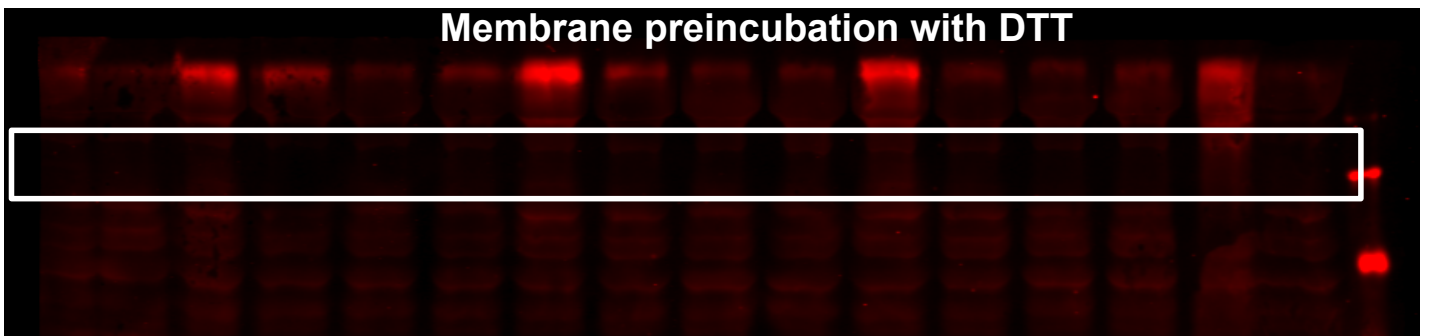

**Figure legend.**

**Online Resource 3. Global protein glutathionylation.** Protein glutathionylation was not increased in sepsis developing mice. In WT mice no increase in glutathionylation could be observed at the level of eNOS/ NOS3.

---

**Methods Online Resource 3.**

**eNOS/NOS3 glutathionylation.** After in situ perfusion with NaCl supplemented with N-ethylmaleimide (NEM)/EDTA hearts were excised from the mice, snap frozen in liquid nitrogen and homogenized in N-ethylmaleimide (40 mM) and SDS (2%) containing HEPES (50 mM, pH7.0) buffer. NEM irreversibly alkylates thiol groups to prevent further S-glutathionylation during sample processing. Protein extracts were separated by SDS-PAGE under non reducing conditions and blotted onto nitrocellulose membranes. S-glutathionylated proteins were detected by Western Blot using an anti-glutathione monoclonal antibody (Thermo Scientific MA1-7620). As negative control the Western Blot membrane was pre-incubated with dithiothreitol (DTT).
