# Supplementary material for: Endothelial NOS (NOS3) impairs myocardial function in developing sepsis
Source: PubMed Central journal article supplement (PMC3597270; doi:10.1007/s00395-013-0330-8), 2013-02-10
Supplement: 395_2013_330_MOESM4_ESM.pdf [file 395_2013_330_MOESM4_ESM.pdf]

## **Online Resource 4.**

### **Article title:**

Endothelial NOS (NOS 3) impairs myocardial function in developing sepsis

### **Journal name:**

Basic Research in Cardiology

### **Author names:**

Annette M. van de Sandt, MD; Rainer Windler, MSc; Axel Gödecke, PhD, Jan Ohlig, MD; Simone Zander MSc, Michael Reinartz, MSc, Jürgen Graf, MD; Ernst E. van Faassen, PhD; Tienush Rassaf, MD; Jürgen Schrader, MD; Malte Kelm, MD; Marc W. Merx, MD

### **Corresponding author:**

Marc W. Merx, M.D.

Department of Medicine

Division of Cardiology, Pneumology and Angiology

Moorenstrasse 5, D- 40225 Düsseldorf

Phone: +49 (0) 211- 8118801, Fax: +49 (0) 211- 8118812

Email: [marc.merx@med.uni-duesseldorf.de](mailto:marc.merx@med.uni-duesseldorf.de)

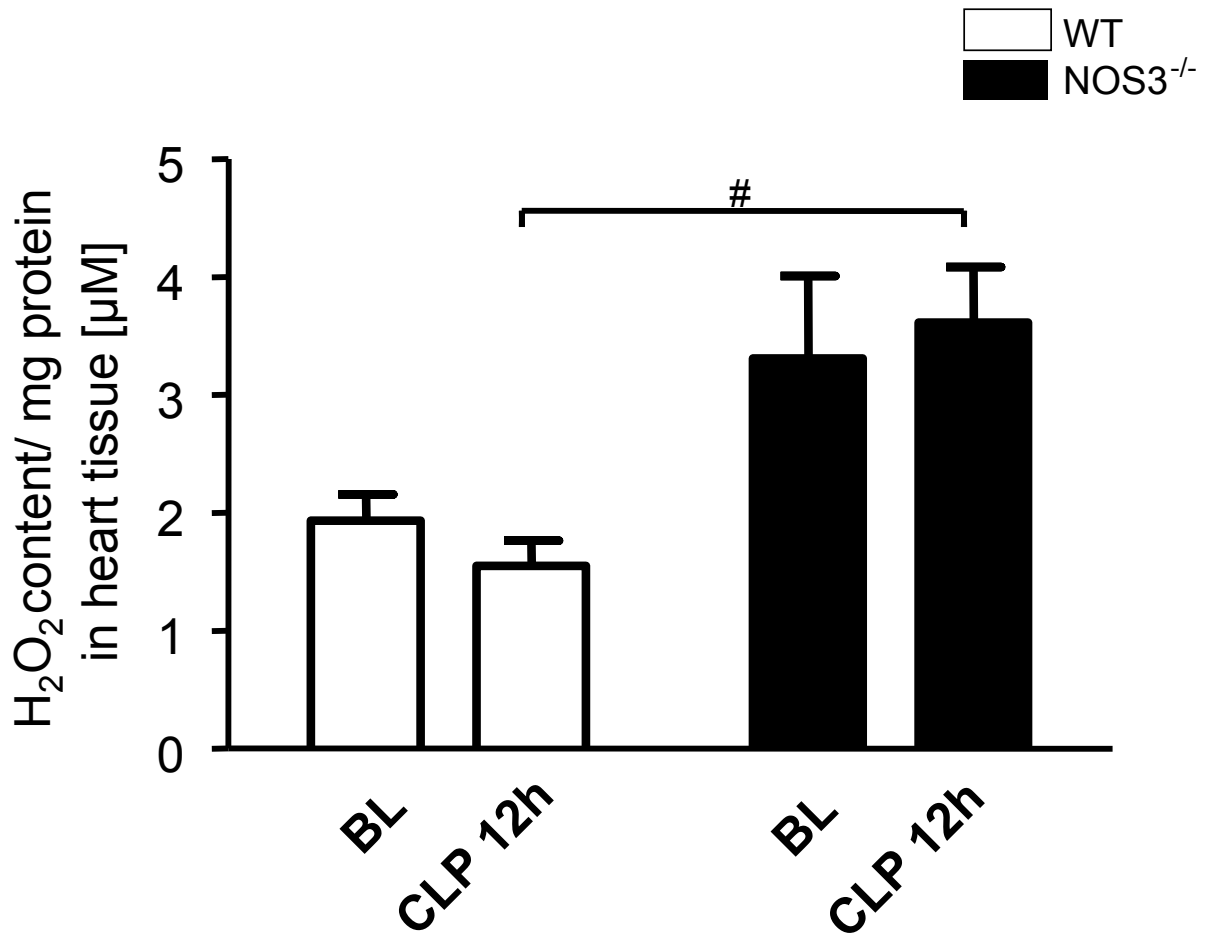

### **Figure legend.**

**Online Resource 4. No signs for significant oxidative stress in heart tissue in developing sepsis.** Fluorometrically determined  $H_2O_2$  generation in cardiac tissues demonstrated no increase in  $H_2O_2$  generation in developing sepsis compared to baseline in both strains.  $NOS3^{-/-}$  mice exhibited more ROS generation at baseline and post CLP compared to WT mice most probably because of basal NO-deficiency (# $P < 0.05$  WT vs.  $NOS3^{-/-}$  mice;  $n=4-5$  per group).

---

### **Methods Online Resource 4.**

**$H_2O_2$  Assay.** ROS generation ( $H_2O_2$ ) in cardiac tissue was determined fluorometrically by monitoring the oxidation of amplex red reagent (10-acetyl-3,7-dihydroxyphenoxazine) to the product resorufin using the Amplex Red Hydrogen Peroxide/ Peroxidase assay kit (Invitrogen, Karlsruhe, Germany) according to manufacturer's instruction. Fluorescence was measured with a fluorescence microplate reader (Floustar Omega, BMG Labtech, Ortenberg, Germany) using excitation at 544 nm and fluorescence emission detection at 590 nm. Background fluorescence, determined for a no  $H_2O_2$ -control reaction has been subtracted from each value.
