# Supplementary material for: Endothelial NOS (NOS3) impairs myocardial function in developing sepsis
Source: PubMed Central journal article supplement (PMC3597270; doi:10.1007/s00395-013-0330-8), 2013-02-10
Supplement: 395_2013_330_MOESM5_ESM.pdf [file 395_2013_330_MOESM5_ESM.pdf]

**Online Resource 5. Isometric force measurements in aortic rings of septic wildtype compared to septic NOS3<sup>-/-</sup> mice**

**Article title:**

Endothelial NOS (NOS 3) impairs myocardial function in developing sepsis

**Journal name:**

Basic Research in Cardiology

**Author names:**

Annette M. van de Sandt, MD; Rainer Windler, MSc; Axel Gödecke, PhD, Jan Ohlig, MD; Simone Zander MSc, Michael Reinartz, MSc, Jürgen Graf, MD; Ernst E. van Faassen, PhD; Tienush Rassaf, MD; Jürgen Schrader, MD; Malte Kelm, MD; Marc W. Merx, MD

**Corresponding author:**

Marc W. Merx, M.D.

Department of Medicine

Division of Cardiology, Pneumology and Angiology

Moorenstrasse 5, D- 40225 Düsseldorf

Phone: +49 (0) 211- 8118801, Fax: +49 (0) 211- 8118812

Email: [marc.merx@med.uni-duesseldorf.de](mailto:marc.merx@med.uni-duesseldorf.de)

a

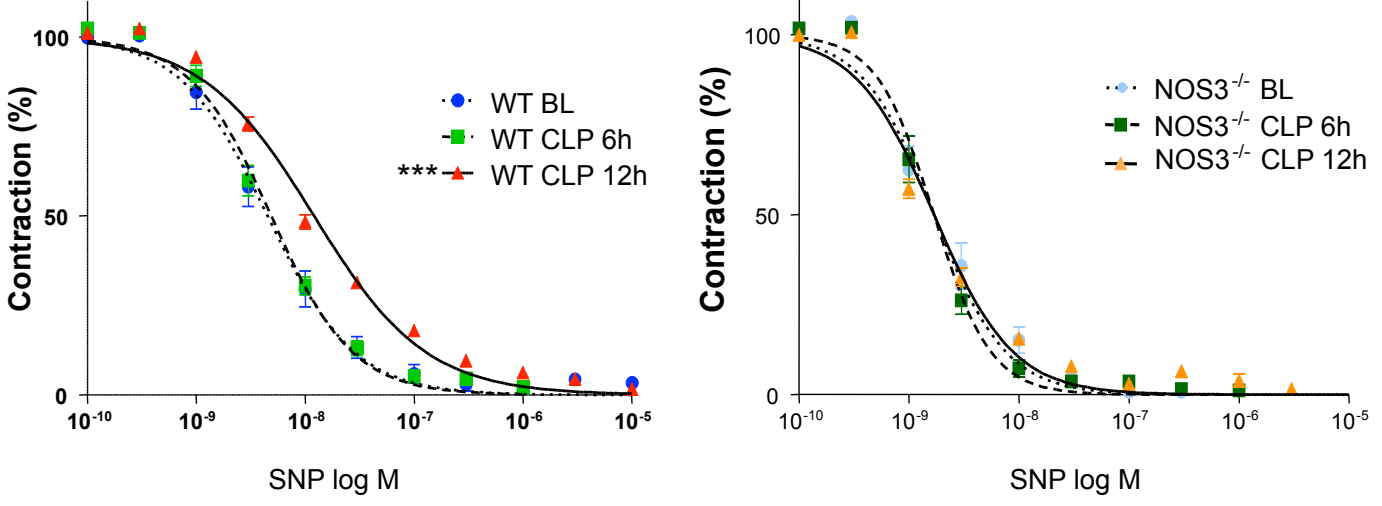

b

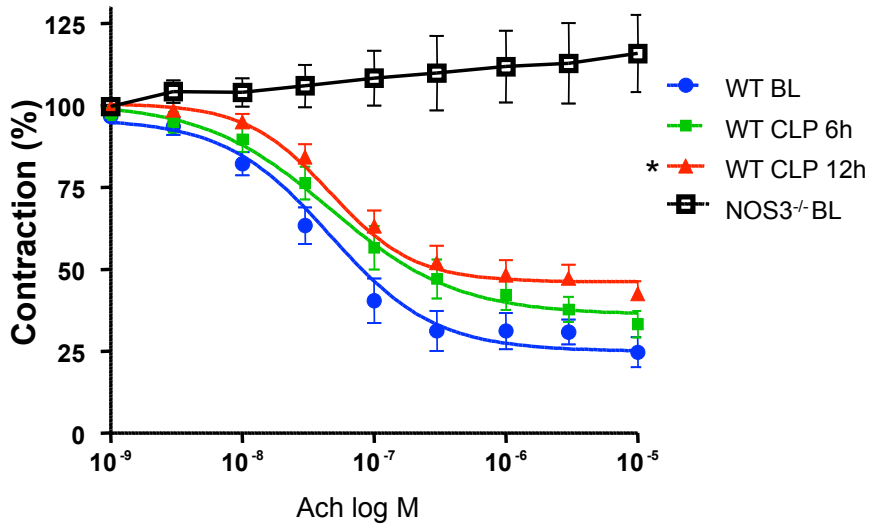

## Figure legend.

**Online Resource 5. NOS3 reduces sensitivity to NO donor in ongoing sepsis as a result of high bioactive NO (A).** Segments of thoracic aorta from wildtype and NOS3<sup>-/-</sup> mice were isolated at baseline, 6 and 12 hours post CLP and subsequently suspended in a myography. After application of SNP isometric force measurements in isolated aortic rings demonstrated a significantly reduced sensitivity to SNP in septic wildtype mice at 12 hours post CLP. Sensitivity to SNP remained stable in NOS3<sup>-/-</sup> during all phases (n= 6-15 per group, \*\*\*P< 0.001 vs baseline wildtype mice). **NOS3 impairs endothelial function in developing sepsis (B).** While NOS3<sup>-/-</sup> mice demonstrated no response to acetylcholine, as it would be expected, septic wildtype mice exhibited significant endothelial dysfunction at 12 hours of sepsis (\*P< 0.05 vs baseline wildtype mice)

---

## Methods Online Resource 5.

**Isometric force measurements in aortic rings.** Thoracic aorta was removed as previously described at baseline, 6 and 12 hours post CLP [1]. Aortic rings were mounted on a myograph, under 1 g of tension, and bathed in 2 mL of Kreb's buffer constantly gassed with 95% O<sub>2</sub>/5% CO<sub>2</sub> at 37 °C. After equilibration phase (90 minutes) tissues were exposed to potassium chloride (80 m) and subsequently phenylephrine (1μM) to achieve maximal contraction. Relaxation response curves to acetylcholine were determined as the response of EC50 to acetylcholine. After precontraction with phenylephrine again, relaxation response curves to increasing concentrations (0,001-10μM) of the NO donor sodium nitroprusside (SNP) were constructed.

## Reference

1. Owen PJ, Ying H, Lang D, Tomlinson D, Lewis MJ, Cheng SY, Lazarus JH (2007) Endothelial dysfunction in a murine model of thyroid hormone resistance. *Eur J Clin Invest* 37:390-395 doi:10.1111/j.1365-2362.2007.01799.x.
